# Supplementary material for: Dual targeting of androgen receptor and mTORC1 by salinomycin in prostate cancer
Source: PubMed Central journal article supplement (PMC5308723; doi:10.18632/oncotarget.11404), 2016-08-19
Supplement: oncotarget-07-62240-s001.pdf [file oncotarget-07-62240-s001.pdf]

## Dual targeting of androgen receptor and mTORC1 by salinomycin in prostate cancer

### SUPPLEMENTARY FIGURES

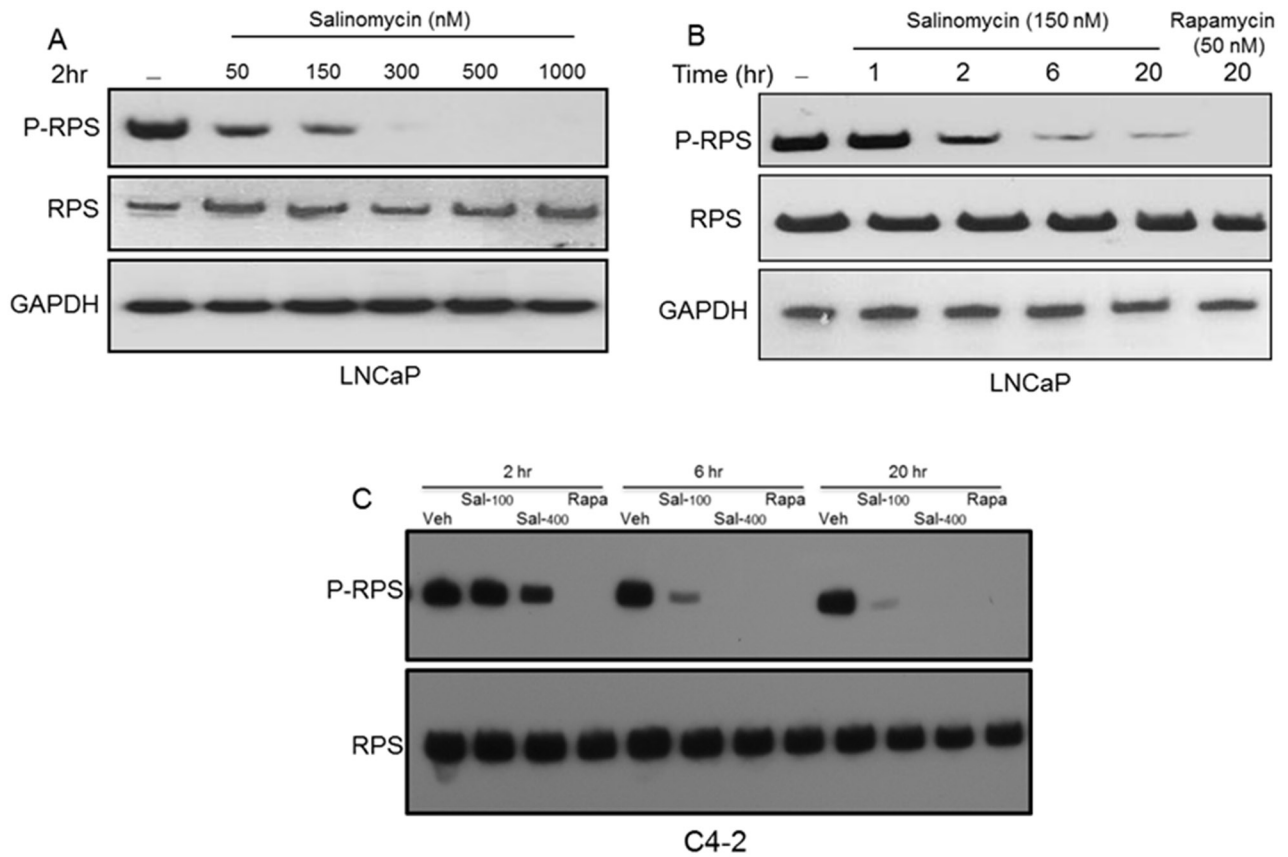

Supplementary Figure S1: Time- and dose-dependent inhibition of RPS phosphorylation by salinomycin. LNCaP A, B. C4-2 C.

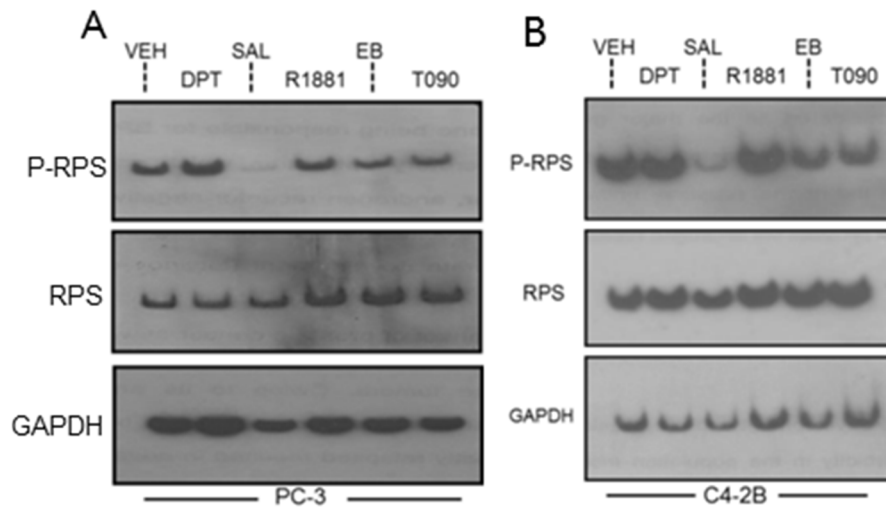

**Supplementary Figure S2: P-RPS levels in cells incubated with various prostate cancer cell inhibitors. A. PC3, B. C4-2B.** DPT: deoxypodophyllotoxin; EB1089(1,25-vitamin D3 analog); T0901317, LXR agonist.

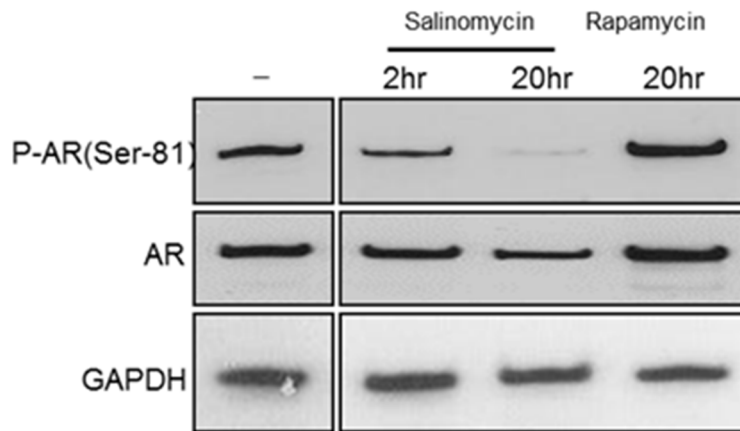

**Supplementary Figure S3: Loss of phosphoAR-Ser81 preceded the loss of total AR in salinomycin-incubated cells.** C4-2 cells were incubated with 200 nM salinomycin for 20 hours. Unlike salinomycin, rapamycin increased the phosphoAR-Ser81 level.

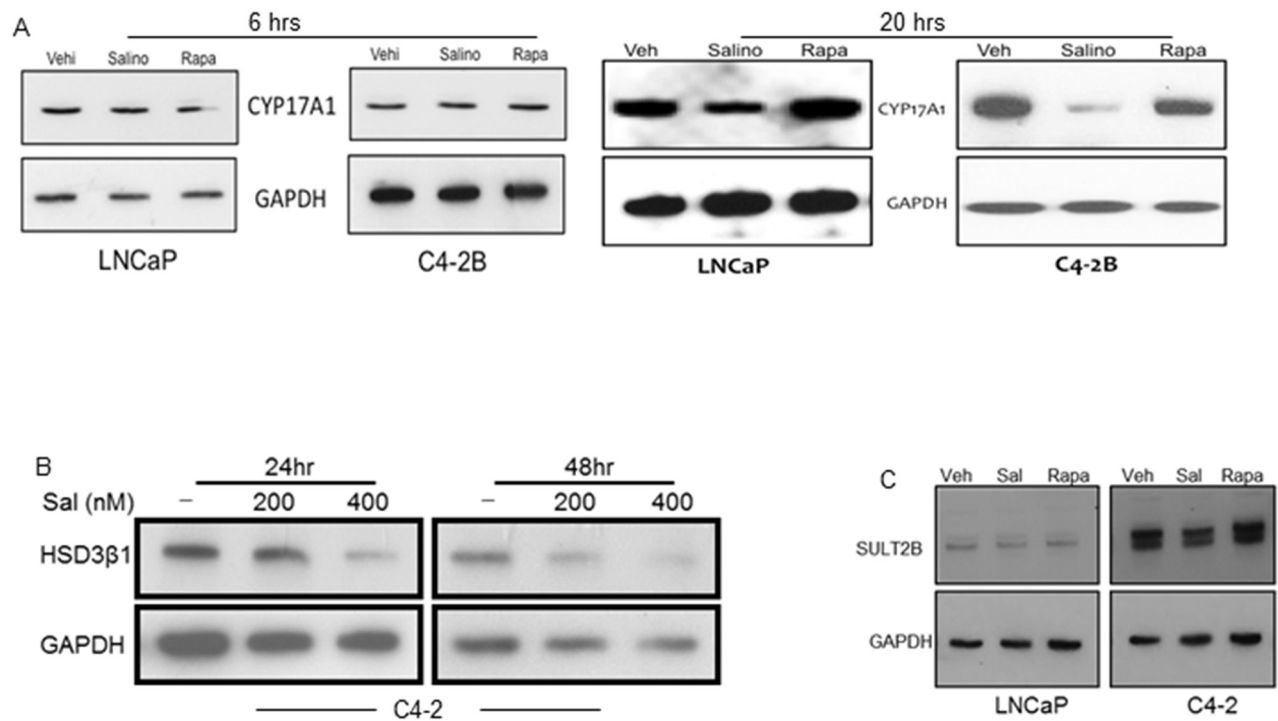

**Supplementary Figure S4: CYP17A1, HSD3β1, SULT2B protein levels at two time points in salinomycin-incubated cells.** **A.** CYP17A1 in multiple cell lines at 6hr and 20hr post-treatment with salinomycin (400 nM) and rapamycin (50 nM). **B.** HSD3β1 levels in C4-2 cells incubated with salinomycin (200 nM and 400 nM) for 24 hours and 48 hours. **C.** SULT2B sulfotransferase levels in cells treated for 20 hrs with salinomycin (400 nM) and rapamycin (50 nM).

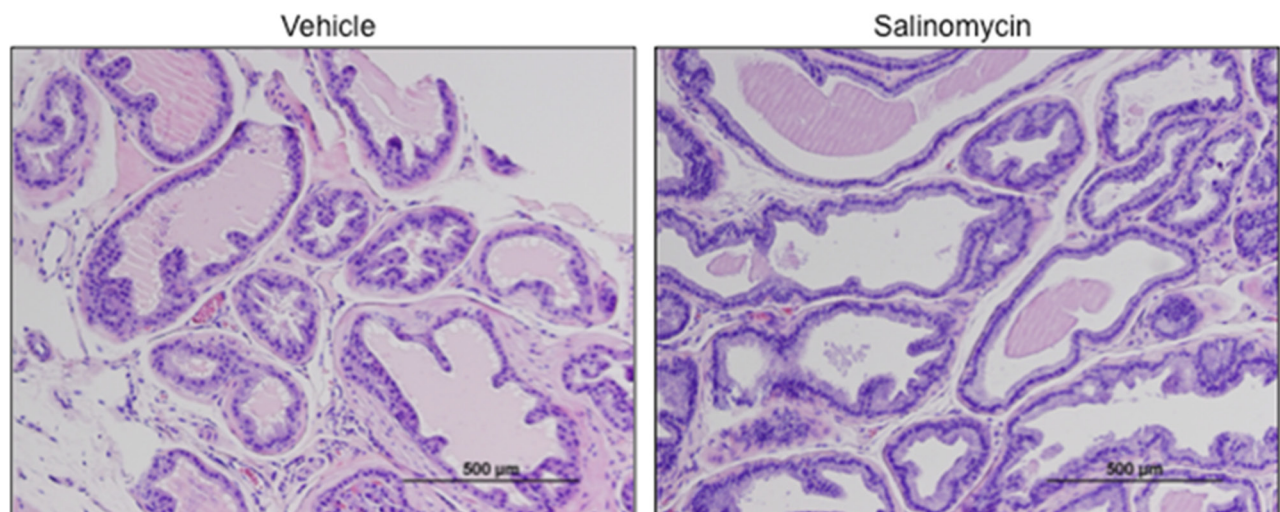

**Supplementary Figure S5: Histology of mouse prostate.** H&E stained paraffin sections of prostates from vehicle- and salinomycin-injected mice with subcutaneously produced LNCaP-II tumor xenografts.

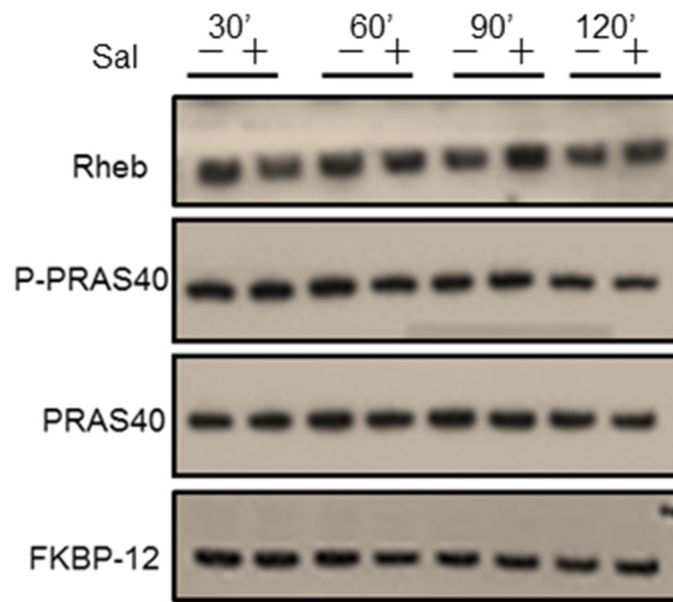

**Supplementary Figure S6: Unchanged levels of P-PRAS40, PRAS40, Rheb, FKBP12.** C4-2 cells were treated for 20 hours with vehicle or Sal (400 nM).

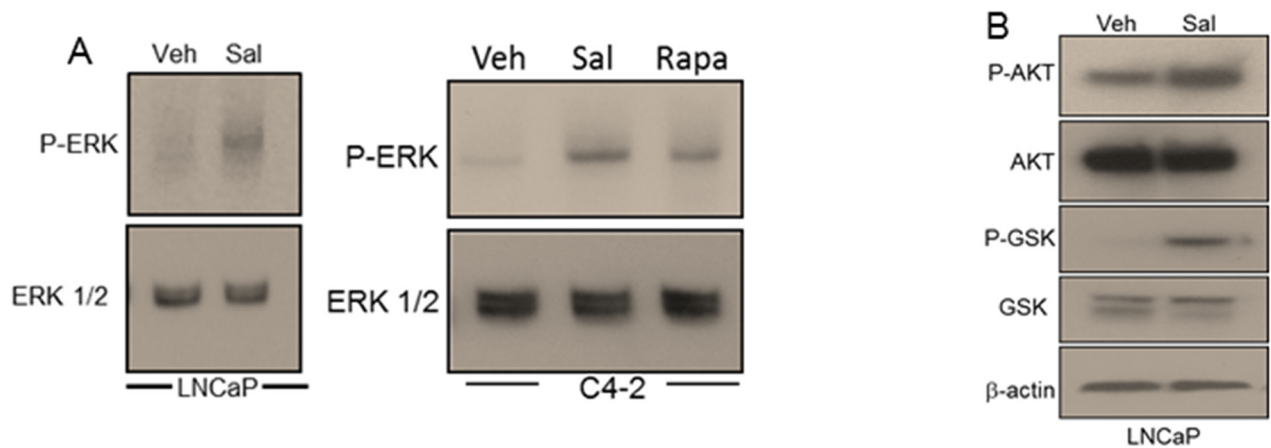

**Supplementary Figure S7: Activation of ERK1/2 Map kinase.** A. ERK1/2 phosphorylation in LNCaP and C4-2 cells treated for 20 hours with 400 nM salinomycin. B. Phosphorylation of AKT-Thr308 and GSK (an AKT substrate) in LNCaP cells.
